# Supplementary material for: Aging reprograms the functional, epigenetic, and metabolic landscape of macrophages
Source: Research Square preprint supplement (doi:10.21203/rs.3.rs-10155437/v1), 2026-06-30
Supplement: Supplementary file 1 [file 7778b789649966ad9d5e4844.docx]

**Supplementary Information**

**Aging reprograms the functional, epigenetic, and metabolic landscape of macrophages.**

Manasa Suresh1*, Francisco Tapia Belmonte2,3, Bryan T. Weselman1, Xintang Li1, Marie Durr1, Isabella Duchovny1, Yanitza Gutierrez-Monsalve4, Matias I. Hepp3,4, Satish Kumar R. Noonepalle1, Alexis Salas-Burgos2,3*,Alejandro Villagra1,3,4*

Affiliations: 1Department of Oncology, Georgetown University, Lombardi Comprehensive Cancer Center, Washington DC, USA; 2Pharmacology Department, Concepcion University, Concepcion, Chile; 3Centro Territorial de Investigación Oncológica Integrativa (CTIOi), Concepción, Chile; 4Laboratoria de Investiagacion en Ciencias Biomedicas, Departamento de Ciencias Básicas y Morfología, Universidad Católica de la Santisima Concepción, Chile.

**Supplementary Table 1:** Gating strategy for flow cytometry analysis of bone marrow-derived macrophages

| 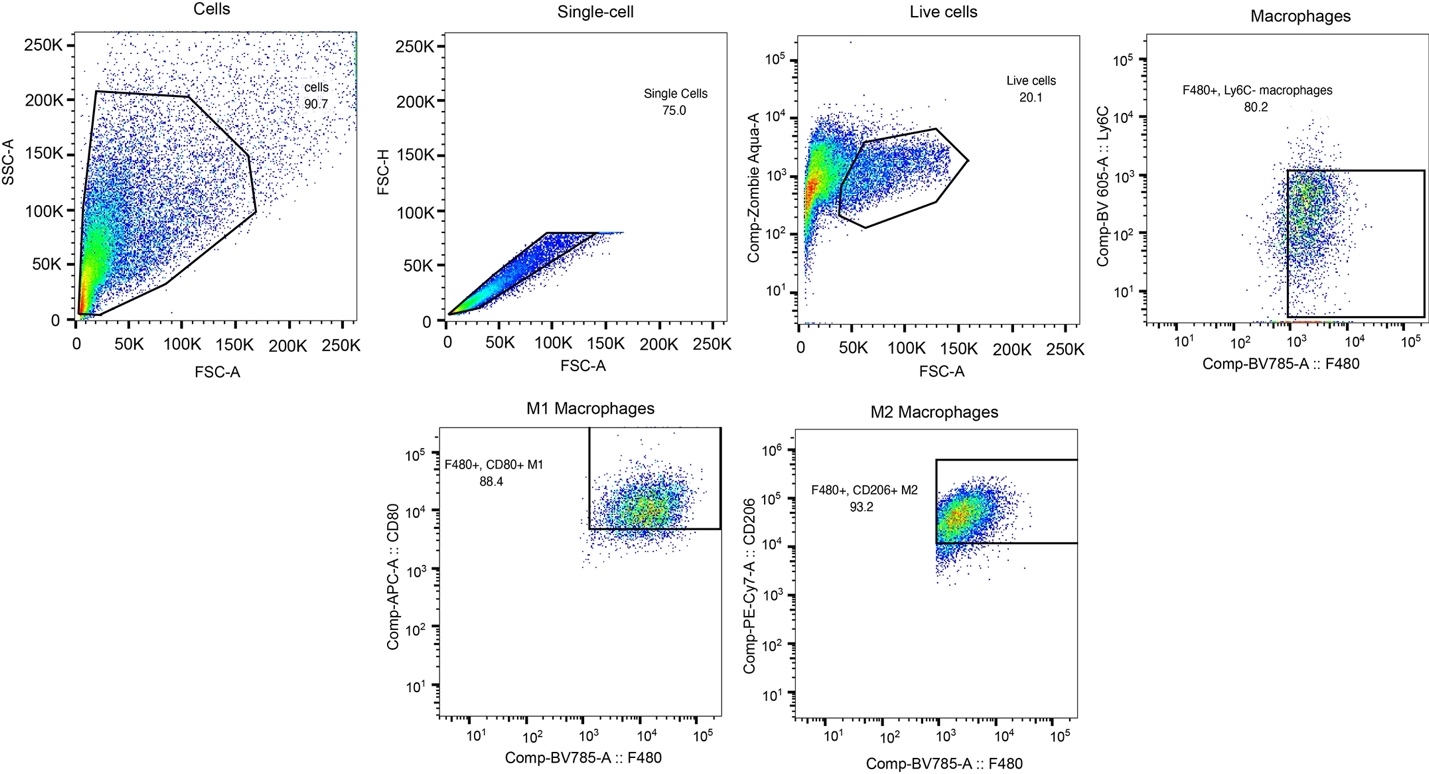 |
| --- |
| Top panel: Cell, single-cell, live cells, and macrophages  Bottom panel: M1 macrophages and M2 macrophages |

**Supplementary Table 2**: List of primers used for qPCR assay

| Gene | Primer | Primer sequence |
| --- | --- | --- |
| *Cdkn2a* | F | TGTTGAGGCTAGAGAGGATCTTG |
|  | R | CGAATCTGCACCGTAGTTGAGC |
| *p21* | F | TCGCTGTCTTGCACTCTGGTGT |
|  | R | CCAATCTGCGCTTGGAGTGATAG |
| *Myc* | F | AGAGTTTCATCTGCGACCCG |
|  | R | GAAGCCGCTCCACATACAGT |
| *Usf1* | F | GCTCTATGGAGAGCACCAAGTC |
|  | R | AGACAAGCGGTGGTTACTCTGC |
| *Nos2* | F | GAGACAGGGAAGTCTGAAGCAC |
|  | R | CAGCAGTAGTTGCTCCTCTTC |
| *Il1β* | Primer mix | Primer mix was obtained from Qiagen – QT01048355 – Mm_Il1b_2_SG Catalog # 249900 |
| *Arg1* | Primer mix | Primer mix was obtained from Qiagen – PPM31770C-200 – RT2 qPCR Primer Assay for Mouse Arg1 Catalog # 330001 |
| *Fizz1* | F | TCCAGCTAACTATCCCTCCACTGT |
| R | GGCCCATCTGTTCATAGTCTTGA |
| *Actb* | F | CATTGCTGACAGGATGCAGAAGG |
| R | TGCTGGAAGGTGGACAGTGAGG |
| *CD80* | F | CCAACCACAGCTTCATGTGT |
| R | TAAGGTAATGGCCCAGGATG |
| *MRC1*  *(CD206)* | F | GGGTTGCTATCACTCTCTATGC |
| R | TTTCTTGTCTGTTGCCGTAGTT |
| *ACTB* | F | CACCATTGGCAATGAGCGGTTC |
| R | AGGTCTTTGCGGATGTCCACGT |

**Supplementary Table 3:** List of antibodies used in flow cytometry assays.

| Antibody | Source | Identifier / Catalog no |
| --- | --- | --- |
| Brilliant Violet 421™ anti-mouse/human CD11b | BioLegend | 101251 |
| Brilliant Violet 785™ anti-mouse F4/80 | BioLegend | 123141 |
| APC anti-mouse CD80 | BioLegend | 104714 |
| PE/Cyanine7 anti-mouse CD206 (MMR) | BioLegend | 141720 |
| Brilliant Violet 570™ anti-mouse Ly-6C | BioLegend | 128030 |
| APC/Fire™ 750 anti-mouse CD45.2 | BioLegend | 109852 |
| Purified anti-mouse CD16/32 | BioLegend | 101302 |
| PE anti-mouse H-2Kb | BioLegend | 116508 |
| APC anti-mouse H-2Kb bound to SIINFEKL | BioLegend | 141606 |
| PE anti-mouse CD80 Antibody | BioLegend | 104708 |
| Biotin anti-mouse CD119 (IFN-γ-R α chain) | BioLegend | 112803 |
| PE/Cyanine7 anti-mouse TLR4 (CD284)/MD2 complex | BioLegend | 117609 |
| APC anti-mouse CS124 (IL4Rα) | BioLegend | 144807 |
| Anti-mouse CD213a1 (IL13Ra1) | Invitrogen | 12-2130-80 |
| Anti-Biotin antibody | Invitrogen | 53-9895-82 |
| Biotin American Hamster IgG Isotype | BioLegend | 400903 |
